# Supplementary material for: Unexpected High Species Diversity of Mesolycus Gorham (Coleoptera, Lycidae) from China, with a Preliminary Investigation on Its Phylogenetic Position Based on Multiple Genes
Source: MDPI journal article supplement (doi:10.3390/insects13121171), 2022-12-17
Supplement: s1 [file s1]

## Supplementary File

# Unexpected high species diversity of *Mesolycus* Gorham (Coleoptera, Lycidae) from China, with a preliminary investigation on its phylogenetic position based on multiple genes <sup>†</sup>

Haoyu Liu <sup>1,\*</sup>, Ruolan Du <sup>1</sup>, Ya Kang <sup>1</sup>, Xueying Ge <sup>1</sup>, Xingke Yang <sup>2</sup> and Yuxia Yang <sup>1,\*</sup>

<sup>1</sup> Key Laboratory of Zoological Systematics and Application, School of Life Science, Institute of Life Science and Green Development, Hebei University, Baoding 071002, China

<sup>2</sup> Key Laboratory of Zoological Systematics and Evolution, Institute of Zoology, Chinese Academy of Sciences, Beijing 100101, China

\* Correspondence: liuhy@hbu.edu.cn (H.L.); yxyang@hbu.edu.cn (Y.Y.)

<sup>†</sup> This published work and the nomenclatural acts it contains have been registered in ZooBank, the Online Registration System for the ICZN (International Code of Zoological Nomenclature). The LSID (Life Science Identifier) for This Publication is: LSID urn:lsid:zoobank.org:pub:ADBEC6C2-5FD6-4182-9AC4-D1717348E1AE.

**Table S1. The distribution information of *Mesolycus* species**

| Species                               | Longitude | Latitude | Location                                            | References |
|---------------------------------------|-----------|----------|-----------------------------------------------------|------------|
| <i>M. mediozonatus</i> (Nakane, 1955) | 139.469   | 35.606   | Japan, Mt. Zohzu, Kagawa                            | [9]        |
|                                       | 138.747   | 35.561   | Japan, Mt. Hohoh, Yamanashi                         | [9]        |
| <i>M. holzschuhi</i> (Bic, 2002)      | 90.140    | 23.300   | NE India, Menghalaya, 3 km E of Tura                | [10]       |
|                                       | 89.740    | 27.490   | W-Bhutan, Thimphu Distr., E of Dochu-la, Menshunang | [10]       |
| <i>M. shaanxiensis</i> sp. n.         | 103.544   | 31.108   | China, Shaanxi, Ningshan, Huoditang                 | This study |
|                                       | 107.843   | 33.852   | China, Shaanxi, Zhouzhi, Houzhenzi                  | This study |
| <i>M. hubeicus</i> (Kazantsev, 2004)  | 110.300   | 31.500   | China, W Hubei, Dashennongjia                       | [9]        |
| <i>M. varus</i> sp. n.                | 99.222    | 27.331   | China, Yunnan, Weixi, Pantiang                      | This study |
| <i>M. sausai</i> (Bic, 2002)          | 101.210   | 21.070   | Laos, 15 km NW Louang Namtha                        | [10]       |
| <i>M. bhutanensis</i> (Bic, 2002)     | 89.750    | 27.491   | W-Bhutan, Thimphu Distr., E of Dochu-la, Menshunang | [10]       |

|                                             |         |        |                                                        |            |
|---------------------------------------------|---------|--------|--------------------------------------------------------|------------|
| <i>M. vitalisi</i> (Pic, 1923)              | 103.775 | 22.304 | Vietnam, Mts W Chapa, Fan-Si-Pan                       | [9]        |
| <i>M. brevipalatus</i> sp. n.               | 98.700  | 27.936 | China, Yunnan, Dimaluo - Biluoxueshan                  | This study |
| <i>M. murzini</i> Kazantsev, 2004           | 94.596  | 23.597 | N Myanmar (Burma), 50 km E Putao, env. Nan Thi         | [9]        |
|                                             | 96.031  | 28.717 | China, Xizang, Zayu, Shang Zayu                        | This study |
| <i>M. atrorufus</i> (Kiesenwetter, 1879)    | 139.690 | 36.219 | Japan, Nankuril Island                                 | [41]       |
|                                             | 138.041 | 36.228 | Japan, Hokkaido                                        | [41]       |
|                                             | 133.670 | 33.803 | Japan, Honshu                                          | [41]       |
|                                             | 130.791 | 32.686 | Japan, Shikoku                                         | [41]       |
|                                             | 138.253 | 36.205 | Japan, Kyushu                                          | [41]       |
|                                             | 133.637 | 33.743 | Japan, Tsukojima                                       | [41]       |
|                                             | 129.722 | 31.721 | Japan, Yakushima                                       | [41]       |
|                                             | 130.514 | 30.355 | Japan, Tanegashima                                     | [41]       |
|                                             | 147.600 | 45.197 | Japan, Chugoku region                                  | [41]       |
| <i>M. nanensis</i> (Kazantsev, 2004)        | 101.070 | 19.130 | N Thailand, Nan Prov., Dai Phu Kha                     | [9]        |
| <i>M. dentatus</i> sp. n.                   | 100.568 | 22.060 | China, Yunnan, Menglongbanna, Mengsong                 | This study |
| <i>M. berezowskii</i> (Kazantsev, 2000)     | 103.826 | 36.059 | China, Gansu                                           | [8]        |
| <i>M. laosensis</i> (Bic, 2002)             | 103.040 | 18.230 | Laos, Saisombun zone, Phou Khao Khouay N. P., Tad Leuk | [10]       |
| <i>M. particularis</i> (Pic, 1928) comb. n. | 85.324  | 27.717 | Nepal, Kathmandu, Godavari                             | [10]       |
|                                             | 105.467 | 21.369 | N Vietnam, Tam Dao                                     | [10]       |
| <i>M. atricollis</i> (Pic, 1926) comb. n.   | 120.695 | 23.506 | Taiwan, Fenchihu                                       | [10]       |
|                                             | 120.437 | 24.152 | Taiwan, Tapang (1800), Taichung-hsien                  | [10]       |
|                                             | 120.666 | 23.299 | Taiwan, Alishan                                        | [10]       |
| <i>M. qinlinganus</i> (Kazantsev, 2000)     | 106.390 | 35.412 | China, Ningxia, Jingyuan, Erlonghe Forestry            | This study |
|                                             | 105.116 | 32.735 | China, Gansu, Fanba                                    | This study |
|                                             | 104.150 | 33.150 | China, Gansu, Qiujiaba                                 | This study |
|                                             | 104.417 | 34.435 | China, Zhouqu, Shatan Forestry                         | This study |
|                                             | 107.245 | 33.300 | China, Shaanxi, Quinling Shan, 35 km S of Baoji        | [10]       |

|                                             |         |        |                                                                       |            |
|---------------------------------------------|---------|--------|-----------------------------------------------------------------------|------------|
|                                             | 100.110 | 27.200 | China, Yunnan prov., Jinsha riv., Daju                                | [10]       |
|                                             | 110.300 | 31.500 | China, W Hubei prov., Dashennongjia Nat. Res., Muyu                   | [10]       |
|                                             | 107.325 | 34.064 | China, Shaanxi prov., QingLing Shan mts., road Baoji, Taibai vill.    | [10]       |
|                                             | 100.160 | 27.130 | China, N Yunnan, Yulongshan mts., E slope,                            | [10]       |
|                                             | 98.540  | 28.060 | China, Yunnan, Hengduan mts.                                          | [10]       |
|                                             | 101.050 | 28.070 | China, NW Sichuan, 30 km NW Muli, Bowa, mixed forest, 3500 m          | [10]       |
|                                             | 104.932 | 33.398 | China, Gansu, Minshan                                                 | [8]        |
|                                             | 100.140 | 27.070 | China, Gansu, W Wudu                                                  | [8]        |
| <i>M. tibetanus</i> (Kazantsev, 2000)       | 103.322 | 30.606 | China, Sichuan, Xiling snow Mts.                                      | [8]        |
|                                             | 99.026  | 28.440 | China, NW Yunnan, E Weixi, Yunling Mt. Range.                         | [8]        |
| <i>M. pygmaeus</i> (Waterhouse, 1879)       | 114.554 | 0.962  | Borneo                                                                | [9]        |
| <i>M. ater</i> (Pic, 1943)                  | 102.077 | 2.210  | Borneo                                                                | [9]        |
| <i>M. shelfordi</i> (Bourgeois, 1906)       | 116.073 | 5.998  | Borneo, Kina-Balu-Geb                                                 | [9]        |
|                                             | 109.329 | -0.402 | Borneo, Pontianak, Borneo                                             | [9]        |
| <i>M. obscurus</i> (Pic, 1912)              | 116.591 | 5.666  | N Borneo, Kinabalu                                                    | [9]        |
|                                             | 102.260 | 0.500  | E Sumatra, Riau Prov., Bukit Tigapuluh N.P.                           | [9]        |
| <i>M. ilyai</i> (Kazantsev, 2000)           | 101.877 | 29.596 | China, Sichuan, Xiling snow Mts.                                      | [8]        |
|                                             | 103.229 | 30.708 | China, Moxi, east of Gongashan                                        | [8]        |
| <i>M. pacholatkoi</i> (Bic, 2002) comb. n.  | 98.986  | 18.798 | N Thailand, Changmai                                                  | [10]       |
|                                             | 105.111 | 26.817 | China, Guizhou, Dakua, 35 km NE Leishan                               | [10]       |
|                                             | 101.247 | 20.941 | Laos, Louangnamtha prov.                                              | [10]       |
|                                             | 98.760  | 25.408 | N Vietnam, Tam Dao                                                    | [10]       |
|                                             | 98.164  | 19.520 | China, Yunnan, Gaoligong mts.                                         | [10]       |
| <i>M. fedorenkoi</i> (Kazantsev, 2013)      | 108.400 | 12.100 | S Vietnam, Lam Dong Prov., Bi DoupNui Ba Nat. Reserve, env. Long Lanh | [13]       |
| <i>M. rubromarginatus</i> (Kazantsev, 2013) | 104.010 | 20.120 | E Laos, Hua Phan Prov., Ban Saleui, Phou Pan Mt.                      | [13]       |
|                                             | 100.568 | 22.060 | China, Yunnan, Menglongbanna, Mengsong                                | This study |

|                                   |         |        |                                                                                    |      |
|-----------------------------------|---------|--------|------------------------------------------------------------------------------------|------|
| <i>M. discoidalis</i> (Pic, 1912) | 116.590 | 5.665  | Borneo                                                                             | [9]  |
| <i>M. jendeki</i> (Bic, 2002)     | 106.350 | 15.020 | Laos, Attapu prov., Bolaven Plateau, 15 km SE of Ban Houaykong, Nong Lom lake env. | [10] |
| <i>M. bolavensis</i> (Bic, 2002)  | 106.350 | 15.020 | Laos, Attapu prov., Bolaven Plateau, 15 km SE of Ban Houaykong, Nong Lom lake env. | [10] |

Table S2. The primers of *COI* gene used for PCR

| Sequence Method   | Gene       | Primer  | Sequence                         | Reference |
|-------------------|------------|---------|----------------------------------|-----------|
| Sanger sequencing | <i>COI</i> | LCO1490 | 5'-GGTCAACAAATCATA AAGATATTGG-3' | [20]      |
| Sanger sequencing |            | HCO2198 | 5'-TAAACTTCAGGGTGACCAAAAAATCA-3' | [20]      |

Table S3. Information on the mitochondrial gene fragments of the Lycidae species used in this study

|         | Tribe        | Species                         | Locality information | Lrna     | COI      | COII      | ND5      | Reference |
|---------|--------------|---------------------------------|----------------------|----------|----------|-----------|----------|-----------|
| Ingroup | Ateliini     | <i>Scarelus anthracinus</i>     | Malaysia             | HM451002 | HM451042 | HM451042* | HM451211 | [4]       |
|         |              | <i>Scarelus pseudoumbosus</i>   | Malaysia             | HM450999 | HM451038 | HM451038* | HM451207 | [4]       |
|         | Calochromini | <i>Micronychus</i> sp.          | RSA                  | KU495971 | KU496109 | KU496109* | KU496202 | [24]      |
|         |              | <i>Lygistopterus sanguineus</i> | Greece               | KU495979 | KU496120 | KU496120* | KU496182 | [24]      |
|         | Calopterini  | <i>Calopteron</i> sp.1          | Panama               | KT752118 | KT751792 | KT751792* | KT751951 | [18]      |
|         |              | <i>Calopteron</i> sp.2          | Ecuador              | KT752129 | KT751803 | KT751803* | KT751962 | [18]      |
|         | Conderini    | <i>Conderis</i> sp.1            | Laos                 | KT752099 | KT751774 | KT751774* | KT751933 | [18]      |
|         |              | <i>Conderis</i> sp.2            | Cambodia             | KT752108 | KT751783 | KT751783* | KT751942 | [18]      |
|         | Dihammatini  | <i>Dihammatius</i> sp.1         | Sumatra              | KT752094 | KT751770 | KT751770* | KT751928 | [18]      |
|         |              | <i>Dihammatius</i> sp.2         | China                | KT752097 | KT751772 | KT751772* | KT751931 | [18]      |
|         | Dilophotini  | <i>Dilophotes</i> sp.1          | Borneo               | DQ180992 | DQ181214 | --        | DQ181368 | [25]      |
|         |              | <i>Dilophotes</i> sp.2          | Malaysia             | KJ405048 | KJ405242 | KJ405242* | KJ405368 | [26]      |

|          |                  |                               |                    |          |          |           |          |            |
|----------|------------------|-------------------------------|--------------------|----------|----------|-----------|----------|------------|
|          |                  | <i>Mesolycus qinlinganus</i>  | China              | OP735349 | OP729892 | OP803897  | OP803899 | This study |
|          |                  | <i>Mesolycus brevipilatus</i> | China              | OP735348 | OP729893 | OP803896  | OP803898 | This study |
|          | Erotini          | <i>Eropterus</i> sp.          | China              | KT752046 | KT751725 | KT751725* | KT751883 | [18]       |
|          |                  | <i>Lopheros</i> sp.           | Japan              | KT752054 | KT751733 | KT751733* | KT751891 | [18]       |
|          | Eurrhacini       | <i>Eurrhacini</i> sp.1        | Nicaragua          | KT752119 | KT751793 | KT751793* | KT751952 | [18]       |
|          |                  | <i>Eurrhacini</i> sp.2        | Ecuador            | KT752120 | KT751794 | KT751794* | KT751953 | [18]       |
|          | Lycini           | <i>Lycostomus</i> sp.         | China              | DQ180981 | DQ181203 | --        | DQ181357 | [25]       |
|          |                  | <i>Lycus</i> sp.              | Zambia             | KT751979 | KT751662 | KT751662* | KT751824 | [18]       |
|          | Lyponiini        | <i>Lyponia nigrohumeralis</i> | China              | DQ180974 | DQ181196 | --        | DQ181350 | [25]       |
|          |                  | <i>Lyponia</i> sp.            | China              | DQ181026 | DQ181248 | --        | DQ181402 | [25]       |
|          | Macrolycini      | <i>Macrolycus</i> sp.1        | Japan              | EF143217 | EF143232 | --        | EF143246 | [27]       |
|          |                  | <i>Macrolycus</i> sp.2        | China              | DQ180975 | DQ181197 | --        | DQ181351 | [25]       |
|          | Metriorrhynchini | <i>Broxylus kalamensis</i>    | Sulawesi           | KC538793 | KC538414 | KC538414* | KC538607 | [5]        |
|          |                  | <i>Cautires</i> sp.           | Borneo             | KC538632 | KC538245 | KC538245* | KC538437 | [5]        |
|          | Platerodini      | <i>Plateros</i> sp.1          | Malaysia           | KT751980 | KT751663 | KT751663* | KT751825 | [18]       |
|          |                  | <i>Plateros</i> sp.2          | Taiwan             | KT751999 | KT751680 | KT751680* | KT751841 | [18]       |
|          | Slipinskiini     | <i>Flagrax</i> sp.1           | RSA                | KT752059 | KT751737 | KT751737* | KT751894 | [18]       |
|          |                  | <i>Flagrax</i> sp.2           | Cameroon           | KT752060 | KT751738 | KT751738* | KT751895 | [18]       |
|          | Thonalmini       | <i>Thonalmus</i> sp.1         | Cuba               | KT752091 | KT751768 | KT751768* | KT751925 | [18]       |
|          |                  | <i>Thonalmus</i> sp.2         | Dominican Republic | KT752093 | KT751769 | KT751769* | KT751927 | [18]       |
| Outgroup | Lyropaeini       | <i>Lyropaeus</i> sp.          | Malaysia           | KT752072 | KT751749 | --        | KT751906 | [18]       |

**Note:**\*indicates that *COI* and *COII* share the same accession number. -- indicates no *COII* mitochondrial gene segments.

**Table S4.** The optimal partition schemes and the best-fit substitute models for the ML and BI analysis of gene segments dataset.

| Partitions | Models  | Genes                         |
|------------|---------|-------------------------------|
| P1         | GTR+I+G | nad3_pos1                     |
| P2         | GTR+I+G | nad3_pos2                     |
| P3         | HKY+G   | nad5_pos3                     |
| P4         | GTR+I+G | rrnL_pos1,rrnL_pos2,rrnL_pos3 |
| P5         | GTR+I+G | cox1_pos1,cox2_pos1           |
| P6         | GTR+I+G | cox1_pos2,cox2_pos2           |
| P7         | HKY+I+G | cox1_pos3,cox2_pos3           |
